# Supplementary material for: Differences in the emotional conflict task between individuals with high and low social adjustment: An ERP study
Source: PubMed Central journal article supplement (PMC6561563; doi:10.1371/journal.pone.0217962), 2019-06-12
Supplement: pone.0217962.s001.pdf [file pone.0217962.s001.pdf]

**Table 1. Mean reaction time and accuracy of face-word Stroop task ( $M \pm SD$ )**

| Dependent variable | High social adjustment |                    | Low social adjustment |                    |
|--------------------|------------------------|--------------------|-----------------------|--------------------|
|                    | Congruent              | Incongruent        | Congruent             | Incongruent        |
| RT (ms)            | 548.57 $\pm$ 32.13     | 572.54 $\pm$ 40.68 | 554.70 $\pm$ 32.53    | 582.97 $\pm$ 33.92 |
| Accuracy           | 0.97 $\pm$ 0.02        | 0.93 $\pm$ 0.04    | 0.98 $\pm$ 0.02       | 0.93 $\pm$ 0.05    |
